# Supplementary material for: Formation of double-cone-shaped ZnO mesocrystals by addition of ethylene glycol to ZnO dissolved choline chloride–urea deep eutectic solvents and observation of their manners of growth
Source: Royal Society of Chemistry journal article supplement (doi:10.1039/d1ce01049b), 2021-01-01
Supplement: d1ce01049b1.pdf [file d1ce01049b1.pdf]

## Supplementary Information

# Formation of Double-Cone-Shaped ZnO Mesocrystals by Addition of Ethylene Glycol to ZnO Dissolved Choline Chloride–Urea Deep Eutectic Solvents and Observation of Their Manners of Growth

*Hajime Wagata,<sup>1\*</sup> Ginji Harada<sup>1</sup>, Eriko Nakashima,<sup>1</sup> Motoki Asaga,<sup>1</sup> Tomoaki*

*Watanabe,<sup>1</sup> Yuya Tanaka,<sup>2</sup> Masaru Tada,<sup>3</sup> and Kunio Yubuta<sup>4</sup>*

<sup>1</sup>Department of Applied Chemistry, School of Science and Technology, Meiji University, Kawasaki 214-8571, Japan

<sup>2</sup>Laboratory for Chemistry and Life Science, Institute of Innovative Research, Tokyo Institute of Technology, Yokohama 226-8503, Japan

<sup>3</sup>Materials Analysis Division, Open Facility Center, Tokyo Institute of Technology, Tokyo 152-8550, Japan

<sup>4</sup>Department of Applied Quantum Physics and Nuclear Engineering, Kyushu University, Fukuoka 819-0395, Japan

Tel.: +81-44-934-7208

Fax: +81-44-934-7906

\*E-mail address of corresponding author: [wagata@meiji.ac.jp](mailto:wagata@meiji.ac.jp)

**Table S1.** Experimental conditions for the growth of ZnO crystals in CU-DES:ZnO mixed with EG

| Run No. | CU-DES:ZnO ZnO conc. / mass% | CU-DES:ZnO mass / g | EG volume / mL | EG addition rate / mL min <sup>-1</sup> | Holding temp. / °C | Aging time / h |
|---------|------------------------------|---------------------|----------------|-----------------------------------------|--------------------|----------------|
| 1       | 3.3                          | 20                  | 80             | 1.0                                     | 150                | 24             |
| 2       | 7.2                          | 20                  | 80             | 1.0                                     | 150                | 24             |
| 3       | 16.7                         | 20                  | 80             | 1.0                                     | 150                | 24             |
| 4       | 16.7                         | 20                  | 80             | 1.0                                     | 150                | 0              |
| 5       | 16.7                         | 20                  | 80             | 1.0                                     | 150                | 12             |
| 6       | 16.7                         | 20                  | 80             | 2.0                                     | 150                | 24             |
| 7       | 16.7                         | 20                  | 80             | 8.0                                     | 150                | 24             |
| 8       | 16.7                         | 20                  | 80             | 1.0                                     | 120                | 24             |
| 9       | 16.7                         | 20                  | 80             | 1.0                                     | 90                 | 24             |

*Detail of calculation of crystallite size by Scherrer's equation*

According to “X-ray Diffraction Procedures: For Polycrystalline and Amorphous Materials 2<sup>nd</sup> ed., (Harold P. Klug, Leroy E. Alexander, JOHN WILEY & SONS, New York, 1967)”, “Elements of X-ray Diffraction 2<sup>nd</sup> ed. (B. D. Cullity, Addison-Wesley, Massachusetts, 1978)”, if we suppose small uniform cubic crystallite, the crystallite size is calculated by Scherrer's equation;

$$L = \frac{0.94\lambda}{\beta \cos\theta}$$

$\theta$ : angle of diffraction peak,  $\lambda$ : wavelength of X-ray,  $L$ : diameter of cubic crystallite,  $\beta$ : full width of half maximum (FWHM) of specific peak.

$\beta$  is calculated by the following equation;

$$\beta^2 = B_M^2 - B_S^2$$

$B_M$ : measured FWHM,  $B_S$ : FWHM of standard sample (crystallite size > 100 nm)

In this study, polycrystalline silicon powder with particle size of 5  $\mu\text{m}$  (KOJUNDO Chemical Laboratory Co., Ltd., 99.9%) was used as a standard sample.  $B_S$  was 0.11°, which was average FWHM of {111}, {220}, and {311}.

The crystallite sizes of the obtained samples are calculated from Scherrer's equation using their XRD peaks. The crystallite sizes and the average particles sizes are summarized in the **Table S2**;

**Table S2.** Crystallite size of the samples calculated from Scherrer's equation and particle dimensions the particles measured from SEM images

| Run No. | Crystallite size calculated from each XRD peak / nm |       |       | Particle size / $\mu\text{m}$ |
|---------|-----------------------------------------------------|-------|-------|-------------------------------|
|         | {002}                                               | {110} | {112} | Length $\times$ Width         |
| 1       | 29                                                  | 23    | 22    | $1.05 \times 0.41$            |
| 2       | 45                                                  | 30    | 27    | $2.42 \times 0.81$            |
| 3       | 45                                                  | 29    | 27    | $3.54 \times 1.26$            |
| 4       | 27                                                  | 19    | 18    | n.d.                          |
| 5       | 47                                                  | 25    | 23    | $1.12 \times 0.56$            |
| 6       | 45                                                  | 34    | 29    | $2.07 \times 0.82$            |
| 7       | 49                                                  | 32    | 27    | $1.32 \times 0.61$            |
| 8       | 48                                                  | 27    | 27    | $1.05 \times 0.45$            |
| 9       | 24                                                  | 19    | 15    | n.d.                          |

The double-cone-shaped and ellipsoidal ZnO mesocrystals were obtained in **Run Nos. 1, 2, 3, 5, 6, 7, and 8.**

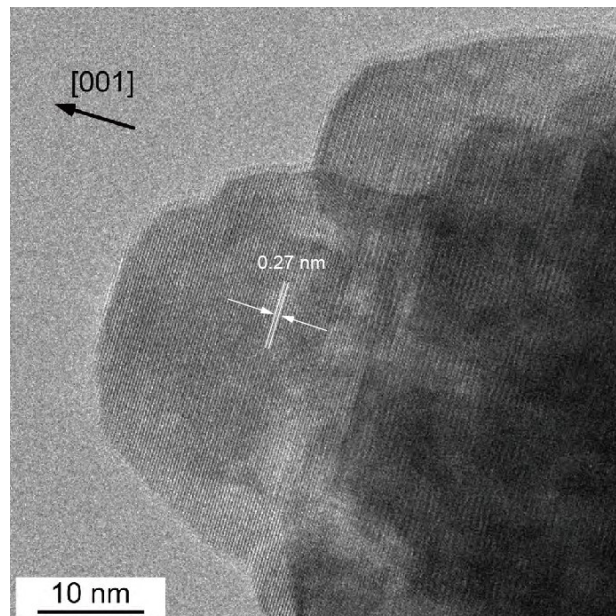

**Figure S1.** Bright-field TEM images and SAED patterns of a ZnO particle prepared with CU-DES (ZnO 16.7 mass%) and aging time for 12 h (**Run No. 5**). Arrows in the TEM images indicate a direction along [001]
